# Supplementary material
Source: publisher site journal article supplement (https://www.degruyterbrill.com/publication/dbid/hdao/downloadAsset/HDAO_Vorworte%20zur%20Druckausgabe.pdf)
Supplement: Supplementary file 1 [file HDAO_Vorworte%20zur%20Druckausgabe.pdf]

# **Vorworte zur gedruckten Ausgabe**

Prefaces to the  
printed volumes

---

Aus:

[Handbuch des Antisemitismus](#)  
[Judenfeindschaft in Geschichte und Gegenwart](#)

Bearbeitet von: Brigitte Mihok

In Zusammenarbeit mit: Werner Bergmann,  
Rainer Kampling, Juliane Wetzel und Ulrich Wyrwa

Herausgegeben von: Wolfgang Benz

**DE GRUYTER**

---

Vorwort aus Band 1:

***Länder und Regionen,***

**Berlin, New York: De Gruyter Saur, 2009.**

**<https://doi.org/10.1515/9783110231373>**

## Vorwort

Ein Handbuch des Antisemitismus, das die Erkenntnisse interdisziplinärer Forschung zusammenführt, gilt seit langem als Desiderat. Im Zentrum für Antisemitismusforschung der Technischen Universität Berlin, dem weltweit einzigen Institut seiner Art, wurde der Mangel eines solchen Instrumentariums seit langem als Herausforderung empfunden.

Gestützt auf die Expertise vieler Autoren in aller Welt soll theoretisches und praktisches Wissen zur Judenfeindschaft allen zugänglich gemacht werden, die als Wissenschaftler, als Lehrer, in den Medien, in der Politik oder in sozialer, administrativer, juristischer Praxis Information benötigen, die Vorurteile und Stereotypen gegen Juden, deren Instrumentalisierung und deren Wirkung – als Antisemitismus im weitesten Sinne – betreffen.

Das Handbuch versammelt das vorhandene Wissen zum Phänomen der Judenfeindschaft ohne zeitliche und räumliche Begrenzung. Antisemitismus als ältestes religiöses, kulturelles, soziales und politisches Vorurteil wird in allen Erscheinungsformen dargestellt und erläutert: Als Vorurteil, als Politikmuster, als Instrumentalisierung von Emotionen, als Aggression vom Pogrom bis zum Genozid. Ohne historische Aspekte (Mittelalter, Frühe Neuzeit) zu vernachlässigen liegt der Schwerpunkt auf der Neuzeit bis zur Gegenwart. Alle Erscheinungsformen (religiös motivierter christlicher Antijudaismus, rassistisch begründeter Antisemitismus, sekundärer Antisemitismus, Antizionismus) werden berücksichtigt.

Als Nachschlagewerk konzipiert, behandelt das Handbuch von begriffsgeschichtlichen Stichworten über biographische Lemmata bis hin zu faktenorientierten Artikeln das Phänomen Antisemitismus in allen Dimensionen. Dazu muss auch die Wirkungsgeschichte des Antisemitismus in Beiträgen über Film, Theater, Literatur und Kunst berücksichtigt werden.

Das Handbuch des Antisemitismus bietet konzentrierte Informationen über die unterschiedlichen Erscheinungsformen von Judenfeindschaft, historische und politisch-ideologische Entwicklungen, über Begriffe, Darstellungsformen und Medien (Sprache, Bild, Film, etc.), Ereignisse wie auch über Personen, die als Antisemiten hervorgetreten sind oder wie z.B. Alfred Dreyfus, Walther Rathenau, Bernhard Weiß, Mendel Beilis in besonderer Weise Ziele von Judenhass waren.

Der erste Band beschreibt in 85 Artikeln die Geschichte und die aktuelle Situation der Judenfeindschaft in allen wichtigen Ländern und Regionen und skizziert dabei jeweils einleitend auch die Geschichte jüdischen Lebens und der Interaktion von Mehrheit und Minderheit. Dass nicht alle Länder der Erde behandelt sind – so erscheint der afrikanische Kontinent nur mit wenigen Nationen im Norden und im Süden – bedarf kaum der Erläuterung: In einigen Staaten ist das Phänomen der Judenfeindschaft nur marginal oder gar nicht vorhanden. Dafür erscheinen mit Barbados, Curaçao, Guyana, Jamaika oder Surinam kleine Nationen, die durch die europäische Einwanderung schon in der frühen Neuzeit Bedeutung im Zusammenleben von Juden und Nicht-Juden und die Entwicklung entsprechender Ressentiments bekamen. In Südamerika erhielt der aus Europa importierte Antijudaismus wie in Bolivien, Brasilien, Chile, Kolumbien, Paraguay, Uruguay oder Venezuela neue Nahrung durch den Antisemitismus, als die NSDAP erfolg-

reich um Sympathien warb und jüdische Flüchtlinge aus Hitlerdeutschland aus ökonomischen und sozialen Gründen Ängste oder Argwohn erregten.

Der europäische Kontinent nimmt nach Umfang und Gewicht den größten Raum in der Topographie der Judenfeindschaft ein, hier wurden die Stereotype und Klischees entwickelt, mit denen Juden definiert und stigmatisiert wurden, ehe ihre Verfolgung einsetzte. Grenzverschiebungen, Nationenbildung und Untergang von Staaten erschwerten die Beschreibung oder machten Teilungen von Lemmata erforderlich. So findet man zum Antisemitismus in Osteuropa die Artikel Russland (bis 1917), Sowjetunion und Russland (nach dem Ende der UdSSR), Schnittmengen geben sich historisch auch mit der Ukraine und Weißrussland, mit Polen und den baltischen Ländern.

Ebenso überschneiden sich partiell auch die Beiträge über Ungarn und Rumänien. Um speziellen regionalen Problemen gerecht zu werden, sind auch Siebenbürgen, Bessarabien, die Bukowina und Transnistrien in eigenen Artikeln behandelt, die ergänzend und übergreifend zu den Beiträgen der nationalen Ebene – Rumänien, Ungarn, Slowakei, Moldova – auf historische und kulturelle Traditionen und Zusammenhänge verweisen.

Übergreifenden historischen Interessen dient auch der Beitrag zum Osmanischen Reich, der die Darstellung der Problematik in Nachfolgestaaten wie der Türkei, Syrien und Libanon, den Ländern Nordafrikas und auf dem Balkan ergänzt. Neben dem Stichwort Jugoslawien finden sich Informationen zur entsprechenden Region auch unter Kroatien, Serbien und Slowenien.

Sieben Karten sollen die Orientierung erleichtern und die Geographie jüdischen Lebens in Lateinamerika, im Osmanischen Reich und in Russland verdeutlichen bzw. Schwerpunkte des Antisemitismus zeigen, der sich in Exzessen und Pogromen im Europa des 19. und 20. Jahrhunderts manifestierte. Eine Karte exemplifiziert Schauplätze der Judenverfolgung unter deutscher Herrschaft 1939-1945.

Wie in jedem Handbuch standen Herausgeber und Redaktion auch vor dem Problem der Transkription fremdsprachiger Namen und Begriffe. Wir haben uns zugunsten der Lesbarkeit und im Interesse der Benutzer aus den verschiedenen Bereichen der Politik, Wirtschaft, Kultur, der Medien oder des Bildungswesens für die im deutschen Sprachgebrauch geltende Umschrift und gegen die (insbesondere von Slawisten geforderte) wissenschaftliche Transliteration entschieden. Wir rechnen mit dem Verständnis der Mehrheit und bitten die Minderheit der Philologen um Nachsicht.

Die folgenden Bände sind Personen (Band 2), Begriffen, Ereignissen und Theorien (Band 3), Organisationen und Periodika (Band 4) und dem Antisemitismus in den Medien Film, Theater, Literatur und Kunst (Band 5) gewidmet. Sie sollen in rascher Folge erscheinen. Herzlicher Dank gilt allen Autoren und dem Verlag K.G. Saur, und dort insbesondere unserer Lektorin Barbara Fischer, die das Projekt von allem Anfang an mit größtem Engagement förderte.

*Berlin im Juni 2008*

*Wolfgang Benz*

---

Vorwort aus Band 2:

***Personen*, Berlin, New York: K. G. Saur, 2010.**

**<https://doi.org/10.1515/9783598441592>**

## Vorwort

Der zweite Band des Handbuchs des Antisemitismus enthält rund 700 Biographien von Personen, die von der Spätantike bis zur Gegenwart auf allen Kontinenten der Erde im Kontext der Judenfeindschaft eine Rolle gespielt haben. Selbstverständlich musste eine Auswahl getroffen werden, und so wird mancher Spezialist einen Namen vermissen, der auf einem Randgebiet wichtig gewesen ist, der aber aus Gründen der Ökonomie keine Aufnahme finden konnte. Andererseits wird mancher Leser mit Erstaunen auf Persönlichkeiten stoßen, die in diesem Zusammenhang nicht ohne weiteres zu vermuten waren. Intention des Handbuchs konnte es aber nicht sein, sich auf Biographien zu beschränken, deren Träger wie Wilhelm Marr, Theodor Fritsch, Georg Ritter von Schönerer oder Julius Streicher die Hetze gegen Juden zu ihrem wichtigsten Lebensinhalt machten. Manche Personen sind aufgenommen, weil sie in bestimmten Lebensphasen antijüdische Einstellungen hatten, die wirkungsmächtig waren oder ihre Weltanschauung bestimmten. Andere, wie der Jurist und Diplomat Johann Ludwig Klüber, eine Koryphäe des Staatsrechts Ende des 18. und zu Beginn des 19. Jahrhunderts, sind berücksichtigt, weil sich in ihnen Zeitgeist spiegelt: Klüber war kein Judenhasser, aber er machte seine Überzeugung öffentlich, Juden seien nicht integrierbar in die deutsche Gesellschaft.

Der Wiener Orientalist Wahrmund erscheint in diesem Handbuch nicht als Verfasser wichtiger philologischer Werke zu den Sprachen Arabisch und Persisch, sondern als Autor der antisemitischen Zeitschrift „Der Hammer“. Aufzuführen waren auch Personen wie Ludwig Woltmann, der als Schriftsteller nicht in die erste Reihe der Antisemiten gehört, der aber als Ideologe des Sozialdarwinismus und der „Rassenhygiene“ das Denken in Kategorien wie „minderwertig“ und „lebensunwürdig“ förderte.

Einige Personen sind deshalb in diesem Handbuch zu finden, weil sie eine bestimmte Funktion mit Einfluss und Wirkung hatten, an wichtiger Stelle antisemitische Gesinnung zur Geltung brachten (oder bringen), ohne selbst programmatisch oder theoretisch als Judenfeinde hervorzutreten. Beispiele sind die Sportfunktionäre Carl Diem, Ferdinand Hueppe und Edmund Neuendorff oder die uruguayische katholische Theaterkritikerin Laura Carreras de Bastos.

Aus vielen Gründen sind die Lemmata auch von unterschiedlicher Länge. So hatte der als Schriftsteller zu Recht vergessene Max Beyer als Verfasser abstruser auflagenstarker Traktate und Pamphlete Ende des 19. Jahrhunderts enormen Einfluss auf den Antisemitismus als völkische Bewegung und war entsprechend ausführlich zu würdigen. Oder der in den USA wirkende katholische Priester Charles Edward Coughlin, der mit seinen Radiosendungen in den 1930er Jahren ein Millionenpublikum erreichte, dem er seinen Judenhass und seine Begeisterung für Adolf Hitler vermittelte. Katholischen Fundamentalismus, amalgamiert mit antijüdischen Ressentiments verbreitet gegenwärtig in Polen der Redemptoristenpater Tadeusz Rydzyk mit der medialen Kraft von Radio Maryja, er ist ebenso gewürdigt wie der in den Schoß der Amtskirche zurückgeholte fundamentalistische Bischof Richard Williamson, der als Holocaustleugner bekannt wurde.

Die biographischen Daten zu wichtigen Personen des Mittelalters und der frühen Neuzeit sind oft spärlich (gelegentlich trifft dies auch für Akteure der Gegenwart zu, wie den früheren Premierminister Malaysias, Mahathir), viele Vertreter der Kirche z.B., die für

ein Handbuch zum Antisemitismus wichtig sind, kennt man vor allem als Verfasser von Predigten oder theologischen Abhandlungen, über ihre Herkunft und ihr Leben ist häufig über ihre Funktion in der Kirchenhierarchie hinaus nichts bekannt.

Generell gilt auch die Regel, dass der Umfang eines Beitrags nicht von der allgemeinen Bedeutung der jeweiligen Person bestimmt ist, sondern davon, welche Zusammenhänge mit dem Thema Juden und Judenfeindschaft bestehen. Der Eintrag zu Johann Wolfgang von Goethe ist daher kürzer als die Darstellungen über Schriftsteller wie Hermann Goedsche oder Johann von Leers, deren Bedeutung im Sinne des Antisemitismus beträchtlich, deren Rang in der Literaturgeschichte jedoch völlig unerheblich ist. Personen, die als Propagandisten der Judenfeindschaft oder als Anstifter von Gewalt in Erscheinung traten, die einem größeren Publikum aber wenig bekannt sind, war größere Aufmerksamkeit hinsichtlich Herkunft und Lebensumständen zu widmen als prominenten Figuren der Geschichte. So waren Hitler, Göring und Himmler als maßgebliche Protagonisten des Völkermords an den Juden Europas zu behandeln, aber nicht in allen Details ihrer Karrieren (die ja in anderem Zusammenhang gründlich dargestellt und leicht abrufbar sind).

Der Leser wird auf Namen stoßen wie den des Schriftstellers Thomas Mann, den man ebenso wie den Philosophen Immanuel Kant nicht auf Anhieb in diesem Zusammenhang vermutet. Bei den Genannten geht es um die Aspekte ihres Werks, die auch das Thema Antisemitismus berühren. Es sind aber auch Biographien wie die des Schriftstellers Émile Zola oder die Theodor Herzls aufgenommen worden, weil sie ihre Stimme gegen den Antisemitismus erhoben oder für die politische Vision des Zionismus als einer Strategie gegen praktizierte Judenfeindschaft gekämpft haben. Andere waren prominente Opfer des Judenhasses wie Joseph Oppenheimer, der als „Jud Süß“ zur literarischen Figur wurde, wie der französische Hauptmann Alfred Dreyfus, der Philosoph Theodor Lessing, der Mathematiker Emil Gumbel, der Sexualforscher Magnus Hirschfeld, der französische Politiker Léon Blum, der Berliner Polizeipräsident Bernhard Weiß, der Politiker Walther Rathenau, der Publizist Eduard Lasker, der Politiker Paul Merker.

Funktionäre des NS-Staats, die nicht in der ersten Reihe standen und deshalb weithin unbekannt blieben, die aber wie Emil Schumburg im Auswärtigen Amt, Wolfgang Dieverge im Propagandaministerium, Hans Diebow als Redakteur des „Völkischen Beobachters“ und Verfasser antisemitischer Hetzschriften, Eberhard Taubert, Fritz Hippler, Hans Hinkel oder Eberhard Wolfgang Möller, als Urheber von antisemitischen Pamphleten, Drehbüchern, Filmen oder als Administratoren der Ausgrenzung und Verfolgung tätig waren, mussten entsprechend ausführlich gewürdigt werden, nicht zuletzt auch deshalb, weil viele von ihnen in der Zeit nach 1945 neue Karrieren starteten wie etwa Kurt Ziesel, der Publizist, der sich im Dritten Reich als fanatischer Nationalsozialist und Antisemit hervortat und in der Bundesrepublik mit Ehrungen überhäuft wurde und der Bundeskanzler Kohl auf einer Israelreise begleiten durfte.

Im biographischen Teil eines Handbuchs des Antisemitismus kann es natürlich nicht darum gehen, Personen als „Antisemiten“ zu etikettieren und damit zu stigmatisieren, wie dies im politischen Tageskampf üblich ist. Die wissenschaftliche Intention einer Sammlung von Biographien unter dem Rubrum Antisemitismus besteht darin, das Verhältnis der Porträtierten zum Judentum und zur Judenfeindschaft zu zeigen; das schließt

geleistete Beiträge zur Entwicklung der Ideologie der Judenfeindschaft ebenso ein wie Propaganda und Organisation des Antisemitismus bis hin zur Täterschaft im Holocaust. Aufgenommen wurden unter dieser Perspektive auch Personen, die durch Abwehr von Judenfeindschaft bekannt wurden, wie der ungarische Rechtsanwalt Károly Eötvös oder der Schweizer Publizist Carl Albert Loosli. Schließlich mussten auch Menschen erwähnt werden, die wie Herschel Grynszpan, Mendel Beilis, Leopold Hilsner und Habib Elghanian katalysatorische Funktion hatten, weil sie benutzt wurden, um Judenhass zu stimulieren, dessen Opfer sie wurden.

Herausgeber und Redaktion haben sich bei der Transkription fremdsprachiger Namen und Begriffe wieder zugunsten der Lesbarkeit und im Interesse der Benutzer für die im deutschen Sprachgebrauch geltende Umschrift und gegen die wissenschaftlich korrektere Transliteration entschieden. Da in Russland bis Anfang 1918 der Julianische Kalender galt, der im 19. Jahrhundert 12 und im 20. Jahrhundert 13 Tage hinter dem Gregorianischen Kalender zurückblieb, sind bei den Lebensdaten beide Datumsangaben aufgeführt.

Allen Mitwirkenden, zuallererst den 176 Autoren, der Redaktion unter Brigitte Mihok, Angelika Königseder, die die Mühen der Schlusskorrektur auf sich nahm, und nicht zuletzt dem Team des Verlags K. G. Saur gilt herzlicher Dank dafür, dass die beiden Teilbände des zweiten Bandes pünktlich ein Jahr nach dem Erscheinen des ersten Bandes folgen.

*Berlin, im Juni 2009*

*Wolfgang Benz*



---

Vorwort aus Band 3:

***Begriffe, Theorien, Ideologien,***

**Berlin, New York: De Gruyter Saur, 2010.**

**<https://doi.org/10.1515/9783110233797>**

## Vorwort

Das Handbuch des Antisemitismus thematisiert im 3. Band in mehr als 150 Artikeln Begriffe, Theorien und Ausprägungen der Judenfeindschaft und der Ideologien, die für den Zusammenhang wichtig sind. Den einzelnen Phänomenen des Judenhasses sind Lemmata wie Antijudaismus, Antizionismus, Erlösungsantisemitismus, islamisierter Antisemitismus, Judeophobie, Radauantisemitismus und Literarischer Antisemitismus, Rassenantisemitismus, Sekundärer Antisemitismus, Linker Antisemitismus, Völkischer Antisemitismus, Überfremdungsantisemitismus oder Moderner Antisemitismus gewidmet. Wie notwendig begrifflich geschärfte Definitionen im historischen und gesellschaftlichen Kontext sind, zeigen die alltäglichen Missverständnisse, wenn etwa der „Moderne Antisemitismus“, der als Rassenideologie im 19. Jahrhundert in Ablösung des religiösen Antijudaismus entstanden ist und vom NS-Regime im Völkermord an den Juden Europas agiert wurde, mit aktuellen Erscheinungen der Judenfeindschaft wie dem Islamismus verwechselt wird.

Einzelne Ereignisse wie die Massaker und Pogrome, deren Opfer Juden seit dem Mittelalter in aller Welt waren, z. B. in Auswirkung des Ritualmordvorwurfs, werden im vierten Band des Handbuchs (Ereignisse, Dekrete, Kontroversen) behandelt. Im dritten Band werden Voraussetzungen, Definitionen, grundsätzliche Entwicklungen in Artikeln wie Friedhofsschändungen, Pogrom, Holocaust, Kennzeichnung und J-Stempel, Selektion, Xenophobie erläutert. Dazu gehören auch spezielle Begriffe wie „*curățirea terenului*“, die rumänische Doktrin der „Reinigung des Terrains“, die den Massenmorden in Bessarabien und der Bukowina im Sommer 1941 voranging, oder der „*Integralismo Lusitano*“, jener Ideologie in Portugal, die vor dem Ersten Weltkrieg Rassismus propagierte, oder die „*Limpieza de sangre*“, ein Begriff, der im Spanien des 15. Jahrhunderts entstand und dazu diente, Juden und Muslime wegen ihres „unreinen Blutes“ auszugrenzen. Nicht immer fiel es dem Herausgeber und der Redaktion leicht zu entscheiden, welcher Eintrag dem Band 3 wegen grundsätzlicher Bedeutung und welcher dem Band 4 wegen seiner speziellen Relevanz zuzuweisen war.

Pejorativa mit langer Tradition wie Bankjude, Drückeberger, Kriegsgewinnler, Kornjude, Schacherjude oder Wucherjude sind ebenso als Begriffe mit ihren Ursprüngen erklärt wie stereotype Vorwürfe und Zuschreibungen, die seit dem Mittelalter aus der Mehrheitsgesellschaft gegen die jüdische Minderheit als Waffen verwendet werden: Brunnenvergiftung, Gottesmord, Hostienfrevel, Rassenschande oder die Ritualmordbeschuldigung.

Für Konvertiten und Zwangsgetaufte, die als Juden zum Christentum übertraten, ohne damit in der Regel dem Misstrauen und der Feindseligkeit der christlichen Gesellschaft zu entgehen, gibt es eine Vielzahl regionaler Bezeichnungen; im Umkreis spanischer und portugiesischer Herrschaft entwickelten sich unter dem Oberbegriff *Conversos* viele Variationen wie *Marranen*, *Meshumadim*, *Moriscos*, *Neofiti*, *Xuetas*. Dazu gehörten auch die *Lançados* an der Westküste Afrikas oder die *Tangomaus* auf den afrikanischen Atlantikinseln. *Anusim* („Gezwungene“) hießen im rabbinischen Verständnis die Juden, die durch Zwangstaufe Christen geworden waren. Als Neuchristen oder Kryptojuden lebten sie seit dem 16. Jahrhundert stets unter dem Argwohn der Mehrheit, nicht anders

als die Dönme im Osmanischen Reich, die zum Islam übergetretenen Juden, die vor allem im Raum Thessaloniki siedelten.

Klassische Begriffe der Judenfeindschaft sind die „Judensau“, das „Mauscheln“, der Spottruf „Hepp Hepp“, die „Verjudung“ oder das „Weltjudentum“. Das Motiv der „Judensau“ verbindet das Schwein als Sinnbild des Teufels in der christlichen Ikonographie mit dem Wunsch, Juden, für die das Tier als unrein gilt, durch die Verbindung zu demütigen. Seit dem Spätmittelalter erscheint die „Judensau“ als Skulptur oder im Bild in der künstlerischen Ausstattung christlicher Gotteshäuser. Mit „Hepp Hepp“ wurden Juden vom Mob am Anfang des 19. Jahrhunderts durch die Straßen gehetzt. In den 1870er Jahren entstand der Bäderantisemitismus, bei dem Gastwirte, Kurverwaltungen, Pastoren und andere Notablen zusammenwirkten, um ihre Sommerfrischen – z.B. die Insel Borkum – „judenfrei“ zu machen. Man war sich einig in der Ablehnung der „Itzigs“, übte sich in Namens- und Talmudpolemik und konstruierte „jüdische“ Eigenschaften wie das „Mauscheln“: Ursprünglich als abschätziger Name für Juden (nach der aschkenasisch-jiddischen Aussprache für Moshe und dessen Diminutiv Mauschel) gebraucht, wurde daraus ein Verb mit der doppelten Bedeutung: wie ein Jude verderbtes Deutsch sprechen und wie ein Jude, nämlich betrügerisch, handeln.

Der Vorwurf, eine Gesellschaft oder die Wirtschaft, die Kultur, die Presse oder die Politik seien „verjudet“, wurde im 19. Jahrhundert – im Kontext der „Judenfrage“ – kultiviert und breitete sich aus wie die Vermutung, es existiere ein verschwörerisch gegen die Mehrheit operierendes „Weltjudentum“, bis es den Zenit in der nationalsozialistischen Propaganda erreichte, die mit diesem Vokabular den Völkermord vorbereitete.

Auf unterschiedliche Weise wurden Pläne zu Legenden. Ob der „Fugu-Plan“ über ein jüdisches Siedlungsgebiet unter japanischer Oberhoheit je existiert hat, ist fraglich. Der „Madagaskar-Plan“, nach dem 1940 die europäischen Juden auf die Insel vor Ostafrika deportiert werden sollten, wurde im Auswärtigen Amt zusammen mit dem Reichssicherheitshauptamt eine Zeitlang diskutiert, er war realer als die Idee des US-Ministers Henry Morgenthau jr., Deutschland nach der Niederlage im Zweiten Weltkrieg zu entindustrialisieren. Entgegen verbreiteter Meinung gehörte der „Morgenthau-Plan“ nie zum Konzept der amerikanischen Politik. Als angeblicher Beleg für die vermeintliche Macht des internationalen Judentums spielt der „Morgenthau-Plan“ in der antisemitischen Literatur jedoch eine beträchtliche Rolle. Noch mehr gilt das für das Pamphlet des jüdischen Amerikaners Theodore N. Kaufman, der unter dem Titel „Germany must perish“ die monströse Idee der Kastration aller Deutschen propagierte. Die Wahnidee eines Einzelnen war Goebbels ebenso willkommen, wie sie unter Rechtsradikalen heute immer noch als „Beweis“ eines jüdischen und US-amerikanischen Vernichtungskampfes gegen Deutschland dient.

Ausdrücke aus dem Wörterbuch des Unmenschen wie Arisierung und Arierparagraph, Endlösung der Judenfrage und Sonderbehandlung, Eugenik und Euthanasie, Fremdvölkisch, Judenrepublik und Judenpresse sind in diesem Band ebenso behandelt wie die älteren Parolen des Judenhasses, etwa Goldene Internationale, Gründerschwindel, Żydomuna.

Den Anstrengungen, Antisemitismus wissenschaftlich und theoretisch zu erklären, sind mehrere große Artikel in diesem Band gewidmet, etwa Antisemitismusforschung

oder Theorien des Antisemitismus (in dem die Konzepte vom autoritären Charakter und andere Ansätze der Frankfurter Schule sowie sozialwissenschaftliche und psychoanalytische Erklärungsversuche ebenso die Krisen- und die Kulturtheorie thematisiert sind).

Allen Autoren, der Redaktion unter Brigitte Mihok sowie Angelika Königseder für die Schlusskorrektur und dem Verlag De Gruyter Saur gilt herzlicher Dank.

*Berlin, im Juli 2010*

*Wolfgang Benz*

---

Vorwort aus Band 4:

***Ereignisse, Dekrete, Kontroversen,***

**Berlin, New York: De Gruyter Saur, 2011.**

**<https://doi.org/10.1515/9783110255140>**

## Vorwort

Der vierte Band des Handbuchs des Antisemitismus informiert über Ereignisse und Affären, über legislative Maßnahmen und politische Proklamationen, über Skandale, Exzesse, Debatten, Prozesse, die Manifestationen von Judenfeindschaft waren, sich darauf bezogen oder dadurch ausgelöst wurden wie die Armleder-Pogrome und die Rintfleisch-Verfolgungen in der frühen Neuzeit, die Hepp-Hepp-Krawalle am Anfang des 19. Jahrhunderts oder der Magdeburger Justizskandal 1925/26, das Luxemburger Abkommen 1952, die Borodajkewycz-Affäre in Österreich 1965.

Legislative Judenfeindschaft und auf Juden bezogene Gesetzgebung haben eine Tradition, die lange zurückreicht und durch Akte wie das Blutreinheitsgesetz (*estatuto de limpieza de sangre*), den Code Noir, das Crémieux-Dekret, Napoleons *Décret Infâme*, das nationalsozialistische „Berufsbeamtengesetz“, das Schriftleitergesetz und die Nürnberger Gesetze, aber auch die „Preußischen General-Juden-Reglements“ 1730 und 1750, die Toleranzpatente in Österreich-Ungarn 1781–1788, Judeneid und Leibzoll, der Judenparagraph in der Norwegischen Verfassung (1814), antijüdische Gesetze, wie sie in Italien, in Jugoslawien, in der Slowakei oder in Ungarn unter faschistischer Herrschaft eingeführt wurden.

Öffentliche Debatten, die in der Schweiz und in Norwegen über das Schächten stattfanden oder in Frankreich die Dreyfus-Affäre zum Abschluss brachten, sind in Artikeln dieses Bandes thematisiert; in der Bundesrepublik Deutschland bewegte die Kontroverse über Rainer Werner Fassbinders Stück „Die Stadt, der Müll und der Tod“ die Gemüter, wie schon 1803–1805 die Grattenauer-Kontroverse oder 1879 der Berliner Antisemitismusstreit.

Die wichtigsten Ritualmordvorwürfe, lokalisiert und zu Gewalt gegen Juden verdichtet, sind in exemplarischen Beiträgen behandelt, chronologisch reicht deren Skala von Norwich (1144) über Amasya (1530) bis Kielce (1946), geographisch von Blois über Vraca, Trient, Konitz nach Xanten. Mit Orten und Regionen verbundene Gewaltexzesse gegen Juden haben ebenfalls oft Ritualmordvorwürfe zum Anlass wie die Pogrome, die in Kischinew, in Polen, im Russischen Reich, in der Slowakei, in Ungarn usw. im 19. und 20. Jahrhundert inszeniert wurden. Eine Ritualmordlegende begründete auch den Anderl-von-Rinn-Kult, der noch im 21. Jahrhundert blüht, obwohl sich die katholische Kirche davon distanziert. Auch die Damaskus-Affäre (1840) gehört in den Umkreis der Ritualmordlegenden, und in weiteren Lemmata finden sich Konnotationen zu dieser jüdenfeindlichen Stereotype.

Sehr viel Raum nimmt die Gewalt ein, die in der langen Geschichte des Antisemitismus geübt wurde, die aber auch noch zur jüdischen Erfahrung der Gegenwart gehört. Pogrome sind in einzelnen Artikeln thematisiert, die sich auf lokale Ereignisse beziehen, aber auch in historischen und geographischen Überblicken, etwa zur Pest-Zeit im Mittelalter und im russischen Bürgerkrieg sowie in Polen, im Russischen Reich, in der Slowakei, in Spanien, in Ungarn, 1848 im Elsass und in Baden. Die Vertreibungen der Juden aus England (1290), aus Frankreich im 14. Jahrhundert, aus Spanien (1492), aus Thrakien (1934) sind dargestellt, ebenso Ereignisse von eher indirekter aber erheblicher Wir-

kung wie der Arabische Aufstand 1936–1939 oder die Unruhen in Dänemark 1813 und 1819.

Das nicht immer rühmliche Wirken der Justiz in Sachen Antisemitismus kommt vielfältig zur Darstellung, bedeutende Verfahren waren der Eichmann-Prozess in Jerusalem 1961 und der Auschwitz-Prozess 1963–1965 in Frankfurt am Main, beide sind exemplarisch für viele andere Anstrengungen, den Holocaust juristisch aufzuarbeiten bis hin zum aktuellen Demjanjuk-Prozess in München. Grundlegende Bedeutung hatten die Nürnberger Prozesse unmittelbar nach dem Zusammenbruch der NS-Herrschaft, ein zentraler Beleg für stalinistischen Antisemitismus ist der Slánský-Prozess in Prag gewesen; Entschädigung für jüdische Zwangsarbeit durch einen nutznießenden Industriekonzern, die Firma IG-Farben, wurde im Wollheim-Prozess in den 1950er Jahren erstmals erstritten. Zum Thema Judenfeindschaft gehört ebenso das Wirken der Inquisition. Die Justiz spielte eine beklagenswerte Rolle im Marburger Antisemitismus-Prozess 1888 sowie bei vielen weiteren Gelegenheiten wie im Fall Leo Frank (USA 1913) oder im Schauprozess gegen László Rajk in Ungarn 1949.

Exzessive Gewalt gegen Juden wurde in der Geschichte Europas oft geübt und ideologisch vorbereitet. Die Kreuzzüge des Hohen Mittelalters, die Armleder-Pogrome und der Fedtmilch-Aufstand in der frühen Neuzeit gehörten lange vor den Pogromen des 19. und 20. Jahrhunderts im Russischen Reich und schließlich im deutschen Raum im November 1938 mit der „Reichskristallnacht“ zur allgegenwärtigen Bedrohung der jüdischen Lebenswelt.

Viele Einträge informieren über den Ausbruch von Gewalt gegen Juden, die Kreuzzüge finden sich aber erst im 5. Band dieses Handbuches, da es den Herausgebern und der Redaktion logisch schien, sie unter dem Rubrum der Täter, die Gewalt organisierten, der Kreuzfahrer, zu behandeln. Damit ist sowohl das Odium, die Kreuzzüge hätten in erster Linie dem Judenhass gedient, als auch die Aufsplitterung der Behandlung des Sachverhalts in verschiedenen Bänden vermieden. Dieses Vorgehen war allerdings nicht in jedem Falle möglich. So erscheint zum Beispiel Holocaustleugnung als aktuelles Phänomen des Antisemitismus in Band 3 (Begriffe, Theorien, Ideologien) unter Holocaustleugnung, dort sind Prämissen, Motive und Verbreitung behandelt. Das gleiche Stichwort ist auch im vorliegenden Band 4 zu finden, hier ist es ausschließlich dem juristischen Straftatbestand gewidmet.

Logik und Konsequenz eines mehrbändigen Handbuches müssen immer wieder Kompromisse mit pragmatischen Erfordernissen schließen. So sucht man in Band 2 dieses Handbuches (Personen) vergeblich die Protagonisten und Akteure einiger judenfeindlicher Skandale: Jürgen Möllemann hat zwar zuletzt mit antisemitischen Stereotypen und Parolen Politik zu machen versucht, wäre aber als Persönlichkeit des Antisemitismus nicht richtig verortet. Ähnlich der ehemalige Abgeordnete Martin Hohmann, der 2003 im Mittelpunkt einer eindeutig judenfeindlichen Affäre stand, aber als Figur nur katalysatorische Funktion hatte und durch einen biographischen Artikel zu hoch bewertet wäre. In den Artikeln Hohmann-Affäre und Möllemann-Affäre ist die jeweilige Causa in Band 4 angemessen verortet. Das gilt in gleicher Weise für den Haider-Muzicant-Konflikt, der sich 2001 in Österreich abspielte, den Fall Deckert, der einen Aspekt von Neonazismus in der Bundesrepublik darstellt, die Fassbinder-Kontroversen, die Harlan-De-

batte, die Waldheim-Affäre und andere mehr. In einigen Fällen war es aber unumgänglich, Protagonisten des Judenhasses wie Mahmud Ahmadinedschad oder Günter Deckert sowohl als Person wie als Namensgeber für bestimmte Komplexe des Antisemitismus im Handbuch aufzuführen. Das gilt auch für den Historiker Heinrich von Treitschke, der in Band 2 als Meinungsführer porträtiert ist und der in Band 4 im Mittelpunkt des Berliner Antisemitismusstreits steht.

Den 110 Autoren der 230 Lemmata dieses Bandes gebührt der erste Dank der Herausgeber. Die Redaktion unter Brigitte Mihok, die das Erscheinen dieses Handbuchs in atemberaubendem Tempo vorantreibt, ist in diesen Dank ebenso eingeschlossen wie Angelika Königseder für die Schlusskorrektur und das Team des Verlags De Gruyter Saur.

*Berlin, im Januar 2011*

*Wolfgang Benz*



---

Vorwort aus Band 5:

***Organisationen, Institutionen, Bewegungen,***  
**Berlin, Boston: De Gruyter Saur, 2012.**

<https://doi.org/10.1515/9783110278781>

## Vorwort

Organisationen, Institutionen und Bewegungen, Parteien und Vereine, staatliche Behörden, Nichtregierungsorganisationen, zwischenstaatliche Gremien, Kirchen und kirchliche Vereinigungen, wissenschaftliche und andere Gesellschaften, Institute, aber auch informelle Zirkel werden im 5. Band des Handbuchs des Antisemitismus vorgestellt. In den rund 320 Organisationen in aller Welt in Geschichte und Gegenwart spielt Judenfeindschaft im Programm oder in der Praxis eine Rolle.

Aber nicht nur Träger und Propagandisten, Förderer und Nutznießer des Antisemitismus, sondern auch Vereinigungen, die sich die Bekämpfung von Judenfeindschaft zum Ziel gesetzt haben, sind in diesem Band zu finden, wie der österreichische Abwehrverein und sein Vorbild, der 1890 in Berlin gegründete Verein zur Abwehr des Antisemitismus, der sich nach erwiesener Erfolglosigkeit 1933 auflöste. In diesen Zusammenhang gehören auch der Centralverein deutscher Staatsbürger jüdischen Glaubens, der Reichsbund jüdischer Frontsoldaten oder die Alliance Israélite Universelle (seit 1860) in Frankreich und auf internationaler Ebene die von New York aus agierende Anti-Defamation League, die 1913 in Chicago als Reaktion auf einen Lynchmord des Ku-Klux-Klan gegründet wurde. Jüngeren Datums sind die Agenturen der Europäischen Union wie das European Monitoring Center on Racism and Xenophobia (EUMC) bzw. die ihr nachfolgende Fundamental Rights Agency (FRA) in Wien sowie das Office for Democratic Institutions and Human Rights (ODIHR) der OSZE in Warschau und die Task Force for International Cooperation on Holocaust Education, Remembrance and Research, in der seit 2000 Vertreter von 28 Ländern nach der „Stockholmer Erklärung“ auch gegen Antisemitismus durch Aufklärung kämpfen.

Organisierte Judenfeindschaft gab und gibt es in allen möglichen Zusammenhängen und in den verschiedensten Spielarten. Historisch war die NSDAP mit ihren Gliederungen und angeschlossenen Verbänden die folgenreichste Organisation, die Antisemitismus propagierte und praktizierte, sie ist in diesem Handbuch ausführlich analysiert, ebenso wie Vorläufer und Epigonen, etwa die Münchner Thule-Gesellschaft nach dem Ersten Weltkrieg oder das aktuelle Thule-Seminar, das sich, 1980 gegründet, als internationale Ideenschmiede zur geistigen Erneuerung Europas versteht. Die Action Française, die British Union of Fascists, rechtsextremistische Organisationen in der Schweiz, die dänische NSDAP, die Deutschvölkische Freiheitspartei, die rumänische Legion Erzengel Michael sind ebenso thematisiert wie neonazistische und andere rechtsextreme Parteien nach 1945, u.a. die NPD, die DVU oder die „Republikaner“ in Deutschland.

Judenfeindliche Gruppierungen mit gesellschaftlicher Akzeptanz waren in der Vergangenheit der Alldeutsche Verband, der Antisemitenbund (Österreich) und die Antisemiten-Liga (Deutschland), die Böckelbewegung, viele Burschenschaften, die Deutsche Tischgesellschaft der Berliner Romantiker, der Dühring-Bund, die Gobineau-Vereinigung. In der Gegenwart wirkungsmächtig oder jedenfalls beachtet, sind die Partei Jobbik in Ungarn, immer noch der Ku-Klux-Klan in den USA, die Muslimbruderschaft in den arabischen Ländern, Organisationen wie HAMAS und Hizbollah, aber auch Laikos Orthodoxos Synargemos. Die 2000 in Griechenland gegründete Partei hatte wie die 1940

bis 1941 aktive Litauische Aktivistenfront oder die in den 1883er Jahren in Frankreich gegründete Ligue antisémitique de France das Ziel, Juden zu diskriminieren.

Die Schweizer Christenwehr der 1920er Jahre war eine radikal antisemitische Sekte, der ein Jahrzehnt später mit den Schweizer Abwehrkomitees Organisationen der Jüdischen Gemeinden selbstbewusste jüdische Kräfte im Kampf gegen den Antisemitismus gegenüberstanden. Radio Maryja in Polen liefert derzeit regelmäßige Beispiele für manifesten katholischen Antijudaismus außerhalb der Amtskirche, wie er aber auch bei Opus Dei und der Priesterbruderschaft Pius X. zu finden ist.

Neben den ideologisch eindeutig festgelegten Organisationen fanden sich judenfeindliche Bezüge auch im Oesterreichischen Alpenverein, bei völkischen Anhängern der Freikörperkultur, in der deutschen Jugendbewegung oder in Turn- und Sportvereinen. Akademische Einrichtungen wie die Kaiser-Wilhelm-Gesellschaft und der Lehrstuhl für Sozialanthropologie in Jena oder als wissenschaftliche Institutionen getarnte Organisationen wie die Forschungsgemeinschaft Ahnenerbe der SS, das Lettische Antisemitische Institut, das Eisenacher Institut, das Institut zur Erforschung der Judenfrage mussten Berücksichtigung in diesem Handbuch finden, weil sie Instrumente der theoretischen Fundierung oder der praktischen Anwendung des Antisemitismus waren. Mit diesen Beispielen ist das organisatorische Spektrum der Judenfeindschaft skizziert, das im 5. Band des Handbuchs behandelt wird.

Zu danken ist den 137 Autoren, deren Sachkunde und Hingabe dieses Kompendium seine Entstehung verdankt. Die Münchner Mitarbeiter des Verlags De Gruyter Saur haben auch diesen Band mit Engagement und Umsicht betreut, Angelika Königseder hat die Mühsal der Schlusskorrektur nicht nur auf sich genommen, sondern mit Bravour vollzogen. Der besonders herzliche Dank der Herausgeber gilt Brigitte Mihok, die das Unternehmen Handbuch des Antisemitismus als verantwortliche Redakteurin auf sicherer Spur hält.

*Berlin im Januar 2012*

*Wolfgang Benz*

---

Vorwort aus Band 6:

***Publikationen,***

**Berlin, Boston: De Gruyter Saur, 2013.**

**<https://doi.org/10.1515/9783110305357>**

## Vorwort

Der sechste Band des Handbuches über Judenfeindschaft in Geschichte und Gegenwart versammelt rund 450 Beiträge über antisemitische Publikationen aus aller Welt, die als Periodika wie „Der Stürmer“ oder die „Bayreuther Blätter“, als Einzelschriften wie Martin Luthers „Von den Juden und ihren Lügen“ und „Ains Juden büechlins verleugung“ seines katholischen Widersachers Johannes Eck den Antijudaismus und den Antisemitismus maßgeblich beeinflussten. Ebenso wie den Inkunabeln des Judenhasses, zu denen etwa „Die Protokolle der Weisen von Zion“ zählen oder Chamberlains „Grundlagen des 19. Jahrhunderts“, Semi-Kürschner und Semi-Gotha, Drumonts „La France Juive“ zu rechnen sind, wurden auch Publikationen aufgenommen, deren Ziel der Kampf gegen den Antisemitismus war. Dazu gehören die „Abwehrblätter“, Émile Zolas „J'accuse!“ oder die C.V.-Zeitung. Von historischen literarischen Mythen wie der Legende von Ahasver, dem „ewigen Juden“, reicht die Skala der Topoi bis zu aktuellen Manifesten der Holocaustleugnung und des Antizionismus. Einschlägige Verlage, deren Programm der Propagierung des Antisemitismus dient, sind in diesem Band zu finden, aber auch Organe und Medien wie die „Gartenlaube“ und der „Osservatore Romano“, deren Zweck nicht unbedingt die Verbreitung der Judenfeindschaft war oder ist, die aber in deren Kontext eine Rolle spielen.

Außer den einschlägig bekannten Zeitungen, die Vorurteile pflegten und Hass gegen Juden propagierten wie der „Völkische Beobachter“, Julius Streichers „Stürmer“ oder Joseph Goebbels' „Angriff“, gab es nicht nur im deutschen Sprachraum bürgerliche Blätter, denen die Verbreitung des Antisemitismus ein Anliegen war. Dazu gehörten im 19. Jahrhundert in Preußen die konservative „Kreuzzeitung“ ebenso wie die katholische „Germania“, in Italien waren es „Osservatore Cattolico“ und „Cittadino di Mantova“, die „Deutsche La Plata Zeitung“ in Argentinien, die „Deutsche Arbeiterpresse“ in Österreich, „Hrvatski narod“ in Kroatien sind weitere Beispiele. Judenfeindliche Gazetten aus der deutschen Provinz waren der „Miesbacher Anzeiger“, in dem Ludwig Thoma nach dem Ersten Weltkrieg gegen die Juden vom Leder zog oder die nur sporadisch erscheinende Zeitschrift „Auf gut deutsch“, in der Dietrich Eckart womöglich noch derber wütete.

Wie aus einer traditionellen Heimatzeitung unter nationalsozialistischer Herrschaft ein antisemitisches Hetzblatt wurde, zeigt der Handbuchartikel über das „Weißenfeler Tageblatt“. Aus Sorge um die Auflage und im Kampf mit der Konkurrenz passte sich die Zeitung den Verhältnissen an, berichtete über „Sittlichkeitsvergehen jüdischer Verbrecher“, hetzte gegen „Stalins Vorliebe für die Juden“ und schrieb über „jüdische Hassfilme in einer amerikanischen Kirche in den USA“, schon ehe das Blatt 1939 in den Besitz der NSDAP überging.

Ungleich wirkungsmächtiger war die Zeitung „Dearborn Independent“. Der Autokönig Henry Ford hatte das Wochenblatt 1919 gekauft und machte es zu einem auflagenstarken Sprachrohr der Judenfeindschaft, in dem er persönlich seinem obsessiven Hass gegen die Juden regelmäßig Luft machte. Die durch antisemitische Kampagnen zur zweitgrößten Zeitung der USA aufblühende Gazette bereitete auch die Bahn für den weltweiten Erfolg der „Protokolle der Weisen von Zion“. Wie aufrichtig die Distanzie-

rung des Industriellen vom Antisemitismus war, die er 1927 verlautbaren ließ, welche Motive seiner Erklärung zugrunde lagen, steht dahin. Der „Dearborn Independent“ war längst der erfolgreichste Wegbereiter bösartiger Judenfeindschaft in den USA.

Natürlich müssen auch Kinder- und Jugendbücher Gegenstand der Aufmerksamkeit sein, wenn es um Publikationen geht, die Antisemitismus verbreiten und fördern sollten. So ist dem berühmten Bilderbuch aus dem Stürmer-Verlag „Der Giftpilz“ ein Beitrag gewidmet, in einem anderen wird das Buch „Trau keinem Fuchs auf grüner Heid und keinem Jud' bei seinem Eid“ vorgestellt. Das „Rassebüchlein für die Jugend“ von 1936 aus der Feder des Rostocker Studienrats Rudolf Wiggers gehört wie das Vorlesebuch der NS-Ärztin Johanna Haarer „Mutter erzähl von Adolf Hitler“ zur wirkmächtigen antisemitischen Indoktrinations-Literatur.

Neben den Lemmata über Richard Wagners „Das Judentum in der Musik“ oder Karl Kautskys „Das Judentum“ und Theodor Lessings „Der jüdische Selbsthass“ gibt es Einträge zu Publikationen wie „Die Lösung der Judenfrage“ von Thomas Mann oder zum 1876 erschienenen Traktat Wilhelm Marrs „Der Sieg des Judenthums über das Germanenthum“. Die Marco-Polo-Affäre in Japan ist thematisiert, die Wirkungsgeschichte des russischen „Buches vom Kahal“ ist behandelt, die „Süddeutschen Monatshefte“ werden als Träger antisemitischen Gedankenguts analysiert. Selbstverständlicher sind neben vielen anderen die Lemmata „Unsere Aussichten“ (Treitschke), „Jüdische Merkwürdigkeiten“ (Schudt), „Mein Kampf“ (Hitler) oder „Der Mythos des 20. Jahrhunderts“ (Rosenberg).

Der herzliche Dank des Herausgebers gilt, wie stets, dem Verlag, dessen Mitarbeiter dem Band alle Sachkunde angedeihen ließen, der Redakteurin Brigitte Mihok, Angelika Königseder für die Schlusskorrektur, den Mitherausgebern und vor allem den 152 Autoren.

*Berlin im Februar 2013*

*Wolfgang Benz*

---

Vorwort aus Band 7:

***Literatur, Film, Theater und Kunst,***

**Berlin, München, Boston: De Gruyter  
Oldenbourg, 2014.**

**<https://doi.org/10.1515/9783110340884>**

## Vorwort

Im siebten Band des Handbuchs des Antisemitismus ist Judenfeindschaft in der Kultur Gegenstand der knapp 300 Lemmata. Antisemitismus ist in der Literatur, im Film, auf der Theaterbühne, in der Bildenden Kunst und Musik auf vielfältige und oft überraschende Weise artikuliert. Dass Wilhelm Raabes „Hungerpastor“ einschlägig zu verorten ist, gehört zur Allgemeinbildung – dass die Brüder Thomas und Heinrich Mann in frühen Jahren an einer eindeutig antisemitischen Zeitschrift („Das Zwanzigste Jahrhundert. Blätter für deutsche Art und Wohlfahrt“) mitarbeiteten, ist weniger bekannt. Heinrich Mann machte seine in frühen Jahren ausgeprägte Abneigung gegen Juden dann auch in seinem ersten Roman „Im Schlaraffenland. Ein Roman unter feinen Leuten“ (München 1900, weitere Auflagen bis 6. Auflage 2006) überaus deutlich.

Die zur literarischen Metapher stilisierte Person des Joseph Süßkind Oppenheimer, von 1733 bis 1737 Finanzienrat am Hof des Württembergischen Herzogs Karl Alexander, ist in Novellen und Romanen, in Theaterstücken und Opern seit seiner Hinrichtung 1738 zumeist als Inkarnation des bösen Juden dargestellt worden. Mehr als 20 Titel sind im Überblicksartikel „Jud Süß in der Literatur“ behandelt, darunter so bekannte wie Wilhelm Hauffs Novelle (1828), Lion Feuchtwangers Roman (1925) und die Studie von Selma Stern (1929) sowie weniger bekannte wie Paul Kornfelds Drama (1930) und Eugen Ortners Volksstück (1933) sowie die Opern von Detlev Glanert (1999) und Gottlieb Blarr (2000). Dem berühmten NS-Film „Jud Süß“ unter Veit Harlans Regie (1940) widmet sich ein eigener Eintrag, und in einem weiteren wird Jud Süß als Sujet des deutschen Nachkriegsfilms betrachtet.

Einige weitere Themen erforderten zusammenfassende Darstellungen wie die nationalsozialistische Filmpolitik, die nationalsozialistische Kunstpolitik, die NS-Musikpolitik und die NS-Literaturpolitik, außerdem die Fülle antisemitischer NS-Filmproduktionen. Aus guten Gründen gibt es auch Lemmata, die den Überblick über Norwegische Kriminalliteratur oder Schwedische Karikaturen bieten. Sinnvoll erschien es in einigen Fällen zudem, Informationen zu bündeln wie im Artikel „Musikwissenschaft“, der für Deutschland und Österreich das 19. und 20. Jahrhundert zusammenfasst.

Eine Inkunabel des gesellschaftlich akzeptierten Antisemitismus im Wilhelminischen Kaiserreich und darüber hinaus in der Weimarer Republik war das berühmte „Borkum-Lied“, das als Symbol des ausgrenzenden Bäderantisemitismus von Kurkapellen intoniert, von Badegästen gesungen und auf Postkarten verbreitet wurde:

„Und wer dir naht mit platten Füßen  
Mit Nasen krumm und Haaren kraus  
Der soll nicht Deinen Strand genießen  
Der muss hinaus, der muss hinaus!“

Trotz der Sanktionen, mit denen nach dem Ersten Weltkrieg das infame Lied bekämpft wurde, entstanden neue Strophen, die bewiesen, dass Judenhass in der bürgerlichen Bevölkerung breiten Konsens fand. Unter dem Stichwort Judenspottkarten wird ein ähnliches Medium, weit verbreitet und wegen seines vermeintlichen Humors weithin akzeptiert, vorgestellt. In Deutschland im Kaiserreich und in der Weimarer Republik, aber



auch in vielen anderen Ländern in Mode, wurden die gängigen Stereotype gegen die Minderheit bildlich akzentuiert. Als Ansichts-, Gruß- und Glückwunschkarten waren sie ein Massenmedium, das die Botschaft der Judenfeindschaft transportierte und allgegenwärtig machte.

Motive der Bildenden Kunst wie „Ecclesia und Synagoga“ oder die „Judensau“ und Medien wie Karikaturen im 19. Jahrhundert, Judenspottkarten, rechtsextreme Comics oder Stürmer-Karikaturen sind so ausführlich beschrieben und exemplifiziert wie einzelne Kunstwerke, etwa die Heiligengraber Hostienfrelbilder aus dem 16. Jahrhundert oder Signorellis „Comunione degli Apostoli“, Kaulbachs „Zerstörung Jerusalems“ (1846) oder Liebermanns „Zwölfjähriger Jesus im Tempel“. In einem Lemma ist die Ausstellung „Entartete Kunst“ analysiert, thematisiert sind auch Monumente, die teils aus künstlerischen, teils aus politischen Antrieben kreiert oder nur geplant bzw. zerstört und wieder errichtet wurden wie das Mendelssohn-Bartholdy-Denkmal in Leipzig, das Richard-Wagner-Nationaldenkmal und das Fritsch-Denkmal. Als erstes antisemitisches Denkmal Deutschlands gefeiert, wurde 1935 im Berliner Bezirk Zehlendorf ein Monument zu Ehren des Publizisten Theodor Fritsch errichtet. Eine fast drei Meter hohe Bronze-Skulptur zeigte den Verfasser des „Antisemiten-Katechismus“, der als „Handbuch zur Judenfrage“ hohe Auflagenzahlen erlebte. Mit dem Denkmal wurde die Aufnahme der Ideologie des Judenhasses in den Kanon der Hochkultur propagiert. Dargestellt ist ein nackter Mann, der eine am Boden liegende drachenartige Gestalt bezwingt und ausholt, um ihr mit einem Hammer auf den Kopf zu schlagen. Kriegsbedingt endete die Existenz des Monuments 1943, als die Bronzefigur eingeschmolzen wurde.

Das Lemma „Deggendorfer Gnad“ zeigt, wie lange antijudaistische Traditionen, transportiert durch Bilder, Wallfahrten und Volksfrömmigkeit, wirken. Eine neue Tradition entsteht vor anderem politischen und kulturellen Hintergrund, in der muslimischen Gesellschaft, mit neuem Vehikel, dem Fernsehen. Die 41-teilige TV-Serie „Faris bila Gewad“ [Reiter ohne Pferd] ist ein prominentes Beispiel dafür. Erstmals während des Fastenmonats Ramadan ab November 2002 von einem ägyptischen Privatsender ausgestrahlt, wurde die Serie in 22 arabische Staaten verkauft und häufig wiederholt. Als Leitmotiv des Historiendramas, das im 19. Jahrhundert im britisch dominierten Ägypten spielt, dienen die „Protokolle der Weisen von Zion“, die aktualisiert und kontextualisiert in den Dienst der antizionistischen Tendenz gestellt werden und mit einprägsamen Bildern beim Publikum antisemitische Übereinstimmung schaffen.

Weithin unbekannte Quellen zum Schicksal der Juden wie die Tagebücher des rumänischen Arztes Emil Dorian (1891–1956) sind ebenso thematisiert wie das Tagebuch der Anne Frank, Informationen zum Film „Schindlers Liste“ finden sich neben Erläuterungen zur Judenfeindschaft im Bänkelsang oder in mittelalterlichen Passionsspielen. Anti-Antisemitische Karikaturen waren ebenso in den Katalog der Lemmata einzubeziehen wie die Sammlungen von antisemitischen Gegenständen. Antisemitismus oder dessen Bekämpfung im Kabarett ist in mehreren Beiträgen zu finden. Mittelalterliche Fastnachtspiele sind auf andere Weise als die Deutsche Wochenschau 1938–1945 für die Verbreitung von Judenfeindschaft wichtig gewesen, und den Stürmer-Karikaturen musste ebenso Raum gegeben werden wie dem von der iranischen Zeitung „Hamshari“ ausgelobten „Internationalen Holocaust-Karikaturen-Wettbewerb“, mit dem 2006 auf

die Mohammed-Karikaturen in der dänischen Zeitung „Jyllands-Posten“ geantwortet werden sollte.

Die Kontroversen um den Roman und den Film „Nackt unter Wölfen“ sind Gegenstand der Darstellungen wie Wilhelm Buschs Bildergeschichte „Plisch und Plum“ oder die Gemeinschaftskomposition „Jüdische Chronik“ als Reaktion auf die antisemitischen Schmierereien Weihnachten 1959. Bedeutende Dramen wie Shakespeares „Kaufmann von Venedig“, Rolf Hochhuths wirkungsreiches Stück „Der Stellvertreter“ und Thomas Bernhards „Heldenplatz“ sind im Handbuch vertreten; aber auch weniger überzeugende Beispiele der Verarbeitung antisemitischen historischen Geschehens wie „Defiant Requiem“ finden sich in diesem Band. Romane und Bühnenstücke, Filme und Werke der Bildenden Kunst sind als Vehikel der Judenfeindschaft behandelt und nicht zuletzt auch literarische Versuche, den Holocaust zu verstehen oder dem Antisemitismus zu wehren.

Ein abschließender 8. Band wird in Bälde folgen. Er hat sich als notwendig erwiesen für Nachträge, aber auch für ausführliche Generalregister, die das Gesamtwerk erschließen. Der Verlag hat dankenswerterweise dieser Notwendigkeit ohne Vorbehalt zugestimmt und damit die langjährige gute Zusammenarbeit einmal mehr bewiesen. Der Dank an die Autoren ist obligat, aber herzlich, nicht minder der Dank an alle Mitwirkenden, an ihrer Spitze Brigitte Mihok, der Redakteurin und Chefin der Logistik des Handbuchs. Angelika Königseder hat auch für diesen Band wieder das Schlusslektorat übernommen und Korrektur gelesen.

*Berlin, im Juli 2014*

*Wolfgang Benz*

---

Vorwort aus Band 8:

***Nachträge und Register,***

**Berlin, München, Boston: De Gruyter  
Oldenbourg, 2015.**

**<https://doi.org/10.1515/9783110379457>**

## Vorwort

Mit diesem, dem achten, Band ist das Handbuch des Antisemitismus abgeschlossen. Der Band enthält neben umfangreichen Registern zum Gesamtwerk Nachträge zu allen Sparten des Unternehmens, neben 61 biografischen Lemmata noch einmal 64 Sachartikel aus der Feder von insgesamt 46 Autoren. Die Notwendigkeit des Supplements hat sich ergeben, während die Bände seit 2008 erschienen sind. In manchen Fällen schien das Thema noch nicht relevant, in anderen war der richtige Autor noch nicht entdeckt oder stand nicht zur Verfügung, als der einschlägige Band Redaktionsschluss hatte. Manches Problem wurde den Herausgebern erst im Zuge der Arbeit bewusst, und manche Notwendigkeit hat sich im Zuge aktueller gesellschaftlicher Diskurse gezeigt, wie die Auseinandersetzungen um Günter Grass' Gedicht „Was gesagt werden muss“ (Ostern 2012) oder die Warnung der „Anti Defamation League“ vor einer Übertragung der Oper „The Death of Klinghoffer“ durch die New Yorker Metropolitan Oper, die simultan und weltweit in 60 Kinos geplant war, aber abgesagt wurde, um keine Demonstration von Judenfeindschaft zu evozieren.

Personenartikel mussten nachgetragen werden in Fällen wie Knut Hamsun, Søren Kierkegaard, Kurt Tucholsky oder Gregor und Otto Straßer, die in Band 2 keine Aufnahme gefunden hatten, oder Personen, deren Würdigung durch neue Forschungen geboten schien wie Friedrich Hasselbacher, Gertzlaff von Hertzberg-Lottin und Karl Schönherr, aber auch Börries Freiherr von Münchhausen, dessen Balladen in den 1960er-Jahren noch in Anthologien für den Schulgebrauch zu finden waren, der inzwischen längst vergessen ist. Zu berücksichtigen waren schließlich auch Personen wie der NPD-Funktionär Udo Pastörs oder die mit Berufsverbot belegte rechtsextreme Rechtsanwältin Sylvia Stolz, die bei den ursprünglichen Planungen des Handbuchs noch nicht ins Rampenlicht getreten waren.

Sinnvoll erschien es, dem Abschlussband einen Überblick zum Thema Antisemitismus in Geschichte und Gegenwart voranzustellen. Zum einen soll damit sachliche Information geboten werden, um Orientierung im zunehmend von Tabus und dogmatischen Postulaten, politischen Statements und emotionalen Befindlichkeiten bestimmten Diskurs über Judenfeindschaft zu ermöglichen. Zugleich ist der Beitrag ein Versuch zur Ortsbestimmung einer wissenschaftlichen Kriterien verpflichteten Antisemitismusforschung, die zunehmend mit den Ansprüchen auf Deutungshoheit durch politische Funktionseleiten, Aktivisten, Verbandsfunktionäre konfrontiert ist. Die Zeiten, als Forschung über Antisemitismus nur von einschlägig festgelegten Patrioten, Judenfeinden und moralisch Unempfindlichen als unnötig, als Ausfluss verächtlich apostrophierten Gutmenschentums oder als Nestbeschmutzung denunziert und abgetan wurde, sind längst vorbei. Ahnungslosigkeit in der Sache triumphiert freilich in beiden Lagern. Die Anstrengung, exaktes Wissen über alle Aspekte der Judenfeindschaft zu einem Handbuch zu bündeln, war auf jeden Fall notwendig und lohnend.

Den Unterzeichnenden erfüllt der Abschluss des Unternehmens mit der großen Befriedigung, dass damit eingelöst ist, was Gegenstand der Verhandlungen war, die 1990 anlässlich seiner Berufung an die TU Berlin als Leiter des Zentrums für Antisemitismusforschung geführt wurden: die notwendige Inangriffnahme des Projekts eines

Handbuchs, das ohne zeitliche und räumliche Begrenzung das Wissen über das Problemfeld Judenfeindschaft in allen ihren Ausprägungen und Aspekten in der gebotenen Breite zur Verfügung stellt.

Zu danken ist vielen, die es ermöglicht haben, dass nach gründlicher Konzeptions- und Vorbereitungsphase im Zentrum für Antisemitismusforschung der TU Berlin seit 2008 die acht Bände im Jahresabstand erscheinen konnten. Die Technische Universität mit ihrem damaligen Präsidenten Kurt Kutzler hat das Unternehmen von Anfang an wohlwollend und über den Ablauf meiner Amtszeit als Leiter des Zentrums für Antisemitismusforschung im März 2011 hinaus unterstützt. Meiner Nachfolgerin Prof. Dr. Stefanie Schüler-Springorum danke ich, dass sie dem Projekt Gastrecht gewährte. Der Verlag De Gruyter, dessen damaliger Chef Klaus G. Saur das Projekt mit großem Enthusiasmus in sein Programm aufnahm, hat in der Münchner Dependence das Handbuch sachkundig betreut und die Zusammenarbeit allezeit als erfreulichen Dialog zwischen Wissenschaft und Öffentlichkeit organisiert. Dafür gebührt Dr. Julia Brauch sowie ihren Vorgängerinnen Barbara Fischer und Clara Waldrich in München ebenso großer Dank wie Dr. Anke Beck und ihrem Vorgänger Dr. Sven Fund in der Verlagsleitung in Berlin.

Für die letzten Bände war die finanzielle Unterstützung durch die Stiftung Erinnerung, Verantwortung und Zukunft sowie die Hans Böckler Stiftung elementar. Das Institut für Vorurteils- und Konfliktforschung Berlin hat weitere Finanzmittel organisiert, für die privaten Spendern und dem Präsidium des Deutschen Bundestags herzlich zu danken ist. Vor allem gebührt den Autoren, die als informeller internationaler Kreis von Experten auch höchst spezielle Aspekte beschrieben und äußerst entlegene Winkel des Problemfeldes von Antijudaismus, Antisemitismus und Antizionismus erhellt haben, herzlicher Dank, ebenso den Mitherausgebern Werner Bergmann, Juliane Wetzel und Ulrich Wyrwa im Zentrum für Antisemitismusforschung. Johannes Heil, der als Spezialist für das Mittelalter ins Kollegium eingetreten war, musste nach dem 5. Band ausscheiden, da seine Pflichten als Prorektor der Hochschule für Jüdische Studien in Heidelberg der Mitarbeit am Handbuch im Wege standen. Rainer Kampling, Ordinarius für Katholische Theologie an der Freien Universität Berlin, ist seit Band 6 Mitglied des Herausgeberkollegiums und hat sich und die Mitarbeiter seines Lehrstuhls zum großen Nutzen des Handbuchs in ganz außerordentlicher Weise engagiert.

Ganz besonders herzlich zu danken ist schließlich den Damen, ohne die das Unternehmen vom Anfang bis zu seinem Ende nicht möglich gewesen wäre: Das Sekretariat lag in den Händen der nimmermüden Ingeborg Medaris, die Anstrengungen der Schlusskorrektur hat Dr. Angelika Königseder bei allen acht Bänden auf sich genommen, und der Begriff Redaktion bezeichnet nur unzulänglich das Engagement und die Verantwortung, mit der Dr. Brigitte Mihok die vielfältigen logistischen, diplomatischen und methodischen Herausforderungen mit der notwendigen Bravour, Akribie und Präzision bewältigte, die mit dem veralteten, aber hier unbedingt treffenden Terminus Schriftleitung umschrieben sind.

*Berlin im April 2015*

*Wolfgang Benz*
